# Supplementary material for: RETRACTED: Does Innovative City Pilot Policy Stimulate the Chinese Regional Innovation: An Application of DID Model
Source: MDPI journal article supplement (doi:10.3390/ijerph20021245), 2023-01-09
Supplement: s1 [file s1]

## Supplementary Material

**Table S1: Descriptive statistics**

| Variable                         | Mean   | Std. Dev. | Min    | Max    |
|----------------------------------|--------|-----------|--------|--------|
| <b>Explained variables</b>       |        |           |        |        |
| <i>innovation index</i>          | 0.047  | 1.938     | -5.273 | 7.058  |
| <i>Patent_invention</i>          | 3.859  | 2.277     | -6.908 | 10.343 |
| <i>Patent_total</i>              | 6.468  | 1.843     | 0.694  | 12.311 |
| <b>Core explanatory variable</b> |        |           |        |        |
| <i>Policy</i>                    | 0.114  | 0.321     | 0      | 1      |
| <b>Control variables</b>         |        |           |        |        |
| <i>Industry_sec</i>              | 0.473  | 0.113     | 0.028  | 0.908  |
| <i>n + g+<math>\delta</math></i> | 2.282  | 0.515     | -2.997 | 3.825  |
| <i>R&amp;D_exp</i>               | 9.371  | 1.843     | 3.872  | 15.528 |
| <i>H_cap</i>                     | 4.474  | 1.118     | -0.525 | 7.179  |
| <i>Finan</i>                     | 16.778 | 1.238     | 13.353 | 21.183 |
| <i>C_profit</i>                  | 5.503  | 0.999     | 1.984  | 8.424  |
| <i>Commu</i>                     | 13.328 | 1.556     | 6.568  | 17.758 |
| <i>Open</i>                      | 9.303  | 2.608     | -6.908 | 14.153 |
| <i>Trans</i>                     | 8.445  | 0.997     | 0.406  | 12.567 |
| <b>Instrumental variable</b>     |        |           |        |        |
| <i>Slope</i>                     | 7.979  | 1.266     | 4.378  | 10.081 |
| <i>Elevation</i>                 | 13.052 | 1.401     | 9.596  | 15.658 |
| <b>Other variable</b>            |        |           |        |        |
| <i>R&amp;D_talent</i>            | 8.298  | 1.077     | 4.602  | 13.603 |

**Table S2: Hausman test**

|         |        |
|---------|--------|
| $X^2$   | 57.66  |
| P-value | 0.0012 |

**Table S3: Heteroskedasticity and autocorrelation tests**

|                                                          |          |
|----------------------------------------------------------|----------|
| <b>Heteroscedasticity</b>                                |          |
| $X^2$                                                    | 12768.18 |
| P-value                                                  | 0.0000   |
| <b>Wooldridge test for Autocorrelation in panel data</b> |          |
| F-value                                                  | 122.993  |
| P-value                                                  | 0.0000   |
